# Supplementary material
Source: Springer Nature journal article supplement (https://www.springermedizin.de/resource/supplementary/13002_2011_222_MOESM3_ESM.pdf/9627420)
Supplement: MOESM3 [file 9627420]

# WEST SIANG

Arunachal Pradesh

Tibet

Latitude:  $27^{\circ} 29' N$  to  $29^{\circ} 23' N$   
Longitude:  $94^{\circ} 2' E$  to  $95^{\circ} 15' E$

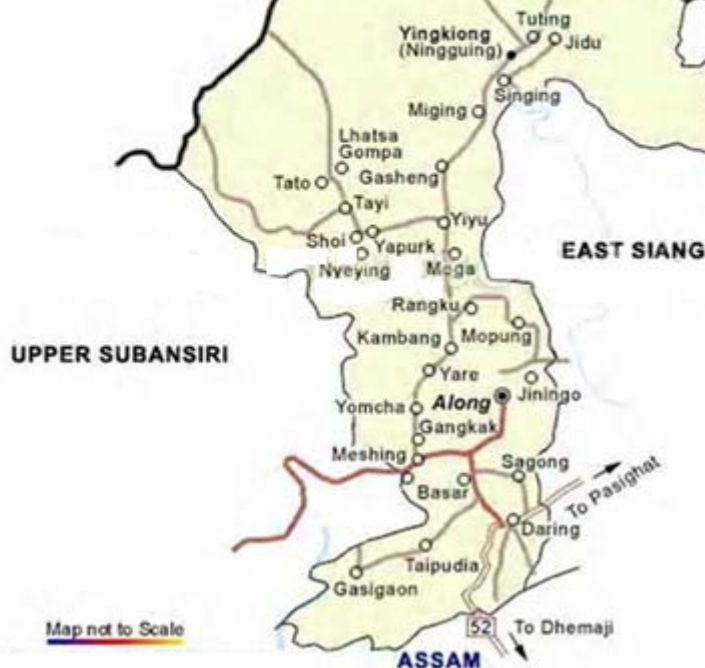

Map not to Scale

ASSAM
